# Supplementary material for: Optimizing fluorescent protein trios for 3-Way FRET imaging of protein interactions in living cells
Source: PubMed Central journal article supplement (PMC4487001; doi:10.1038/srep10270), 2015-07-01
Supplement: srep10270-s1.pdf [file srep10270-s1.pdf]

## Supplemental Info: Optimizing the fluorescent protein trio for 3-Way FRET imaging of protein interactions in living cells

Brandon L. Scott and Adam D. Hoppe\*

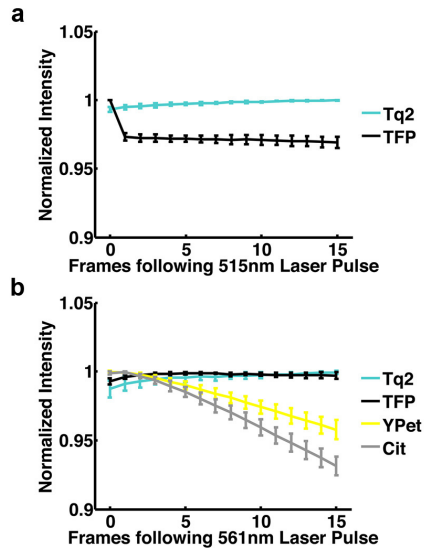

**Figure S1. Negligible incidental donor bleaching occurs during the acceptor photobleaching sequence.** Control experiments performed on COS-7 cells that express donor only FPs. **a.** COS-7 cells expressing Cyan (Tq2 and TFP) FPs were photobleached by collimated 515nm laser illumination (1,500 ms pulse at 72 W/cm<sup>2</sup>; 15 cycles). Incidental photobleaching was less than 5% over the course of the experiment, and no photobleaching correction was required. **b.** COS-7 cells expressing Cyan (Tq2 and TFP) and Yellow (YPet and Citrine) FPs were photobleached by collimated 561nm laser illumination (4,500 ms pulse at 95 W/cm<sup>2</sup>; 15 cycles). Incidental photobleaching was less than 5% over the course of the experiment with the exception of Citrine (7%), and no photobleaching correction was required. All error bars are standard deviation with N= 10.

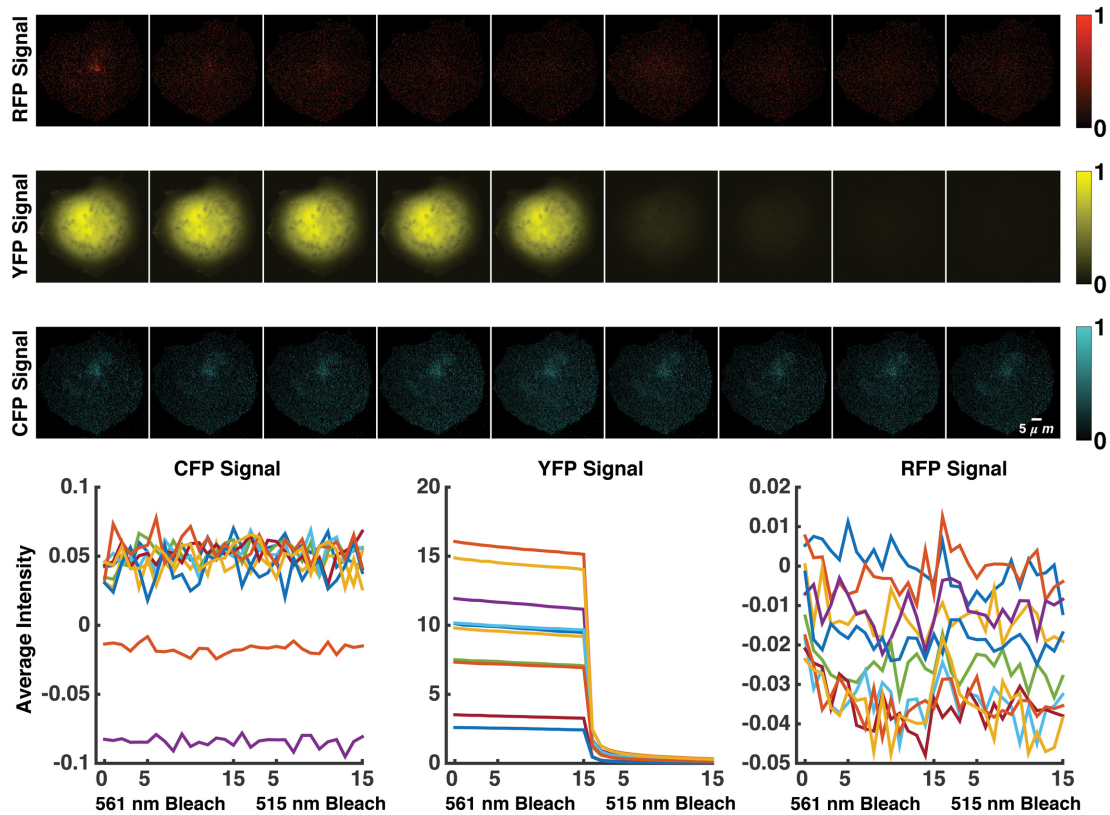

**Figure S2. A CFP-like molecule is not detected during acceptor photobleaching sequence of YPet.** Control experiments performed on COS-7 cells that express only YPet were photobleached by collimated 561nm laser illumination (4,500 ms pulse at 95 W/cm<sup>2</sup>; 15 cycles) followed collimated 515nm laser illumination (1,500 ms pulse at 72 W/cm<sup>2</sup>; 15 cycles). **b.** Average intensity of 10 cellular ROIs indicates that there is no increase in the CFP channel following bleaching with either the 561 or 515 nm lasers.

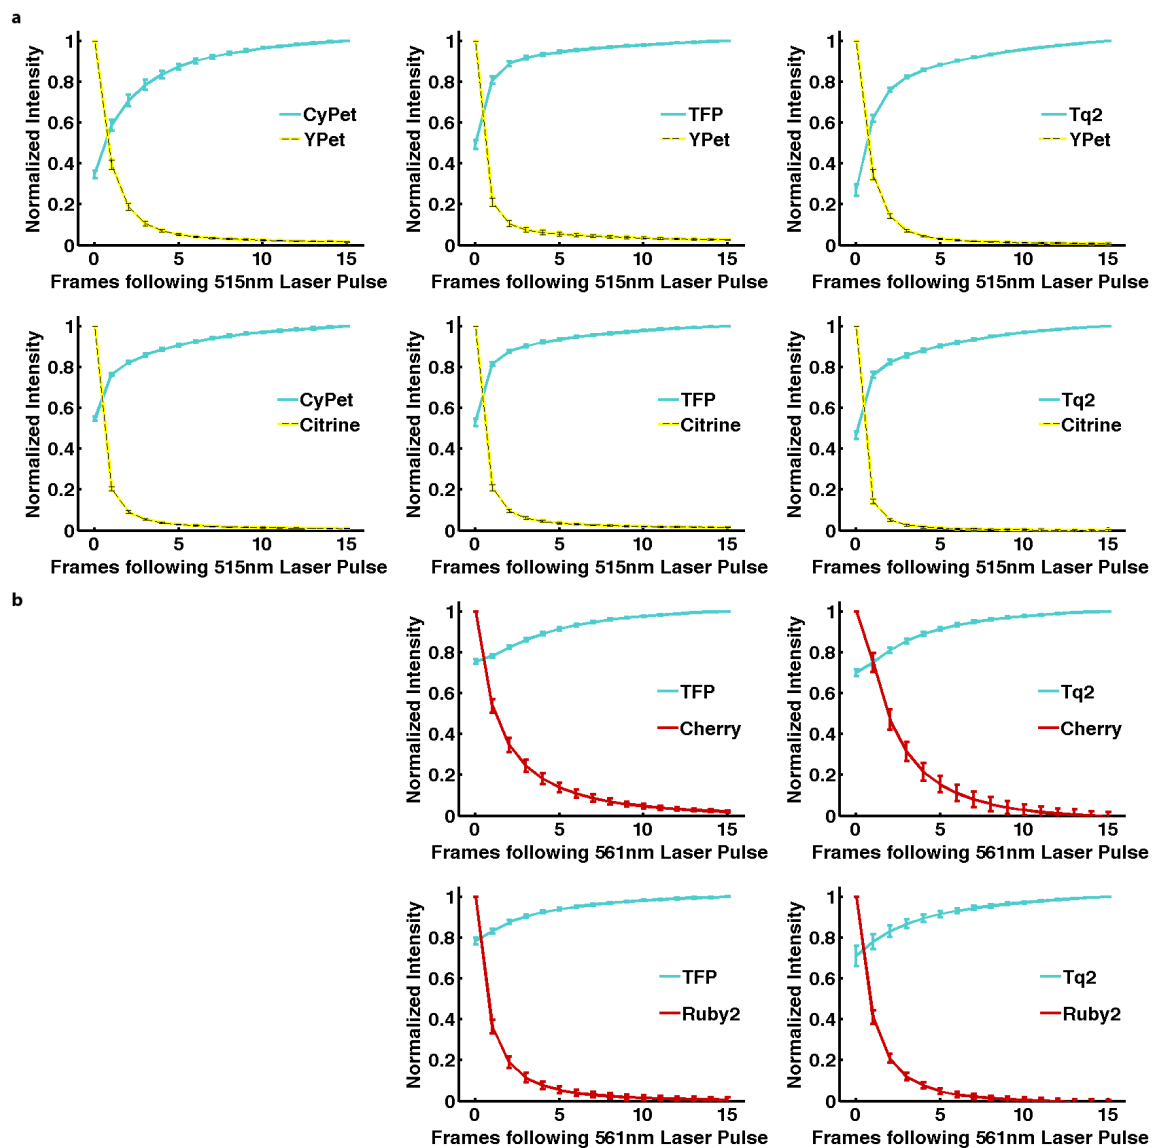

**Figure S3. Quantified bleaching with cyan donors. a.** Bleaching curves for data associated with Figure 2. **b.** Bleaching curves associated with Figure 4.

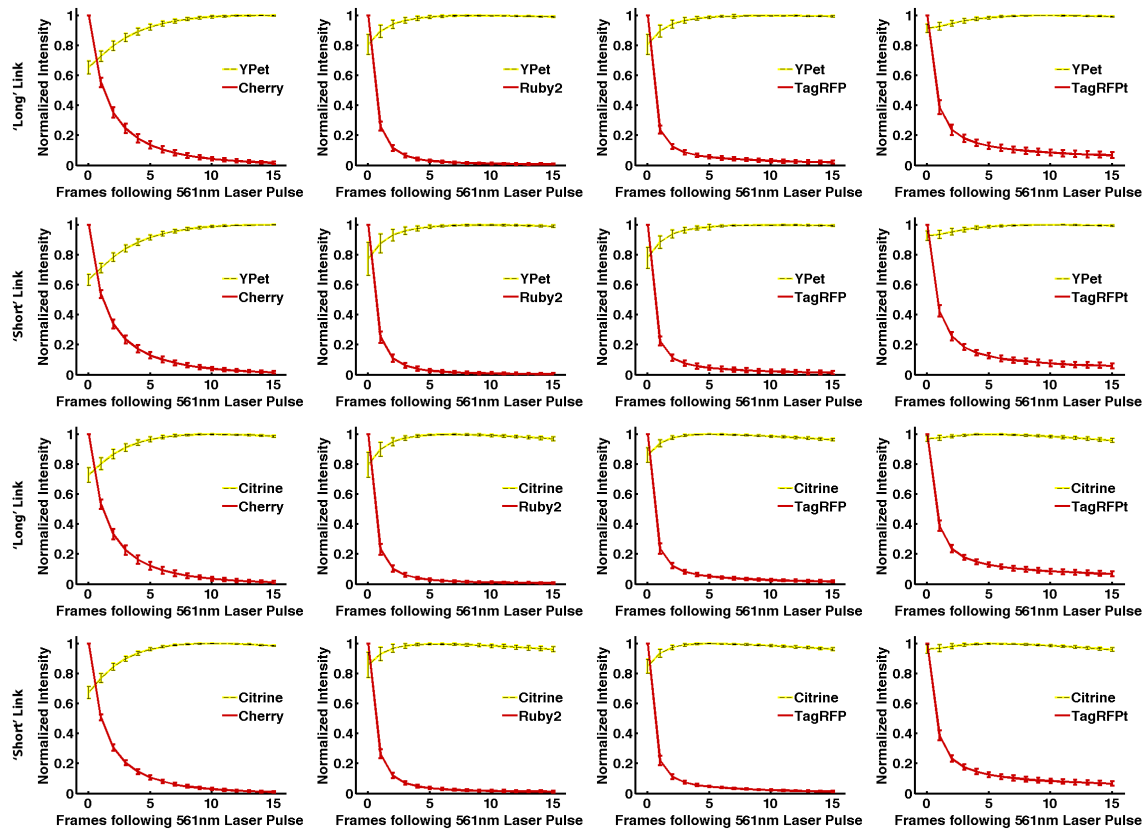

**Figure S4. Quantified bleaching with yellow donors.** Bleaching curves for the yellow-red constructs associated with Figure 3.
